# Supplementary material
Source: publisher site journal article supplement (http://spandidos-publications.com/6294/downloadSupplementary)

Figure S1. Expression level of NRG2 among breast cancer subtypes and its prognostic and diagnostic values. (A) NRG2 expression in different subtypes of BRCA. (B) Kaplan-Meier survival analysis of NRG2 between normal and LumA subtype. (C) Kaplan-Meier survival analysis of NRG2 between normal and LumB subtype. (D) Kaplan-Meier survival analysis of NRG2 between normal and HER2 subtype. (E) Kaplan-Meier survival analysis of NRG2 between normal and Basal subtype. (F) ROC curve of NRG2 in LumA of BRCA. (G) ROC curve of NRG2 in LumB of BRCA. (H) ROC curve of NRG2 in HER2 of BRCA. (I) ROC curve of NRG2 in Basal of BRCA. \*\*\* $P < 0.001$ . NRG2, neuroregulatory protein 2; HR, hazard ratio; AUC, area under curve; CI, confidence interval; ROC, receiver operating characteristic; FPR, false-positive rate.

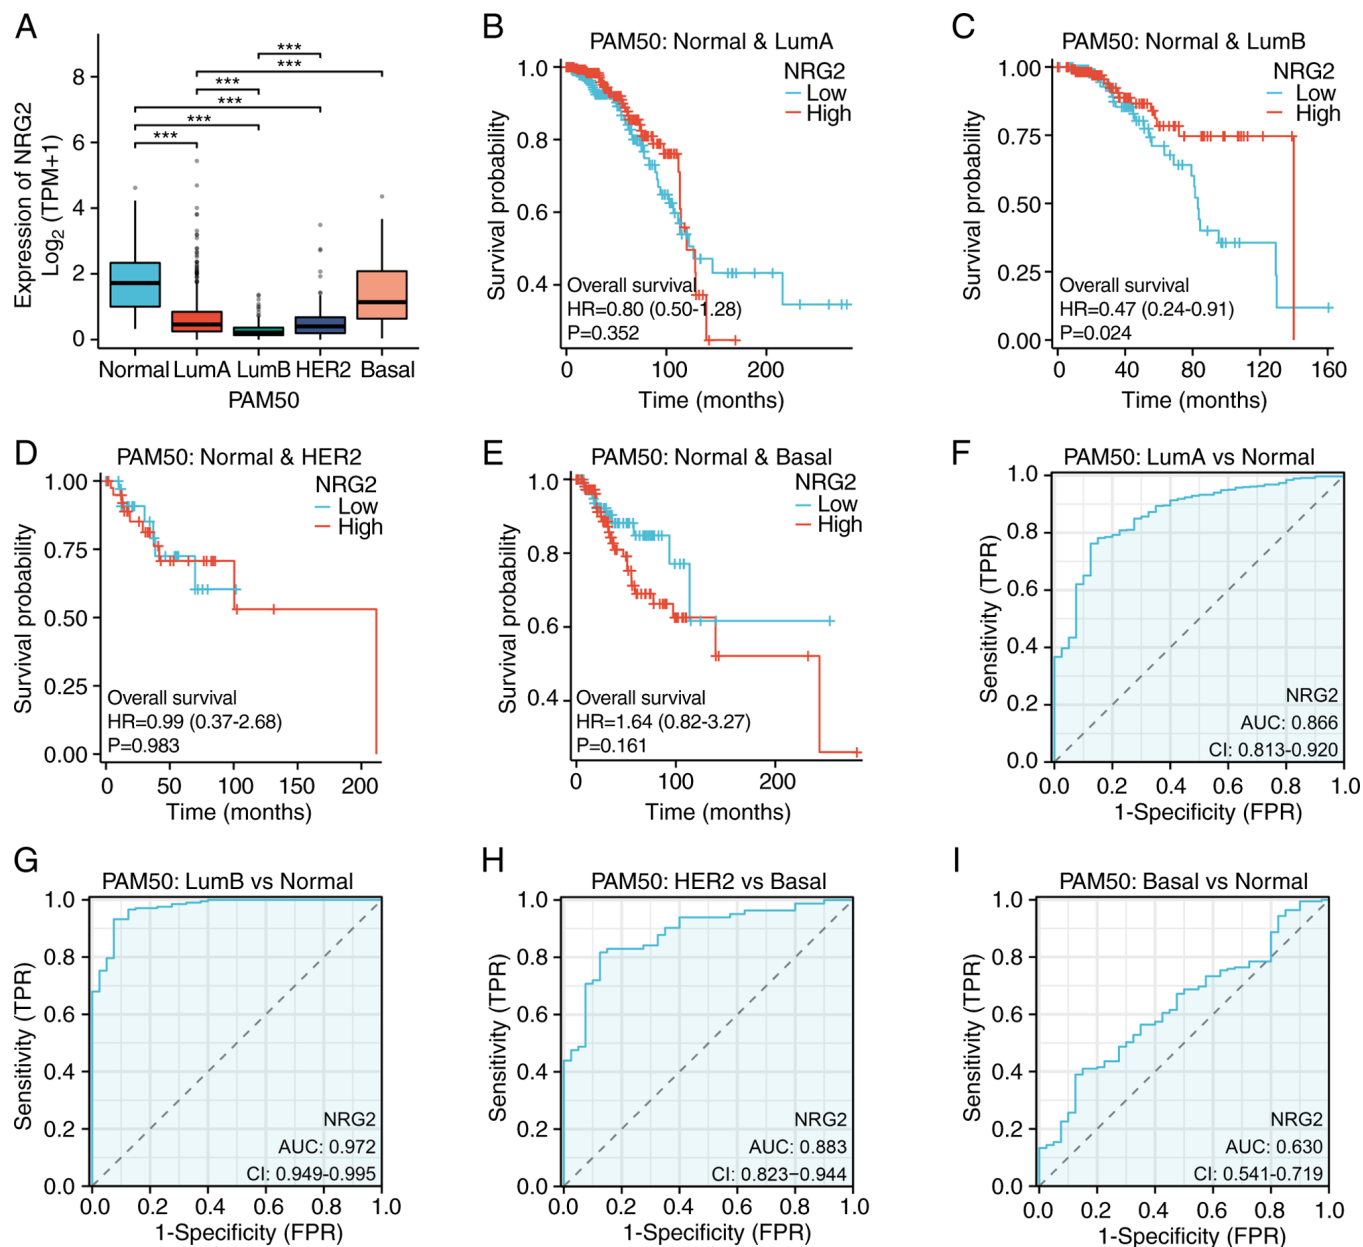

genes. NRG2, neuroregulatory protein 2.

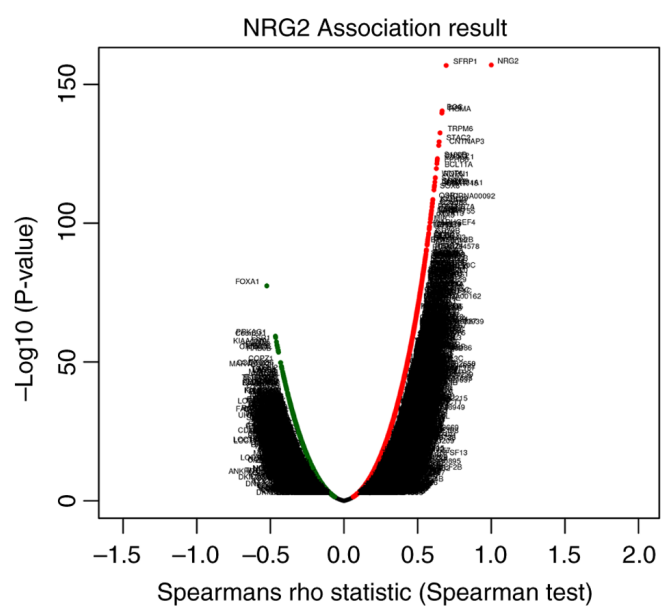

Figure S3. Heat map of positively related genes of neuroregulatory protein 2.

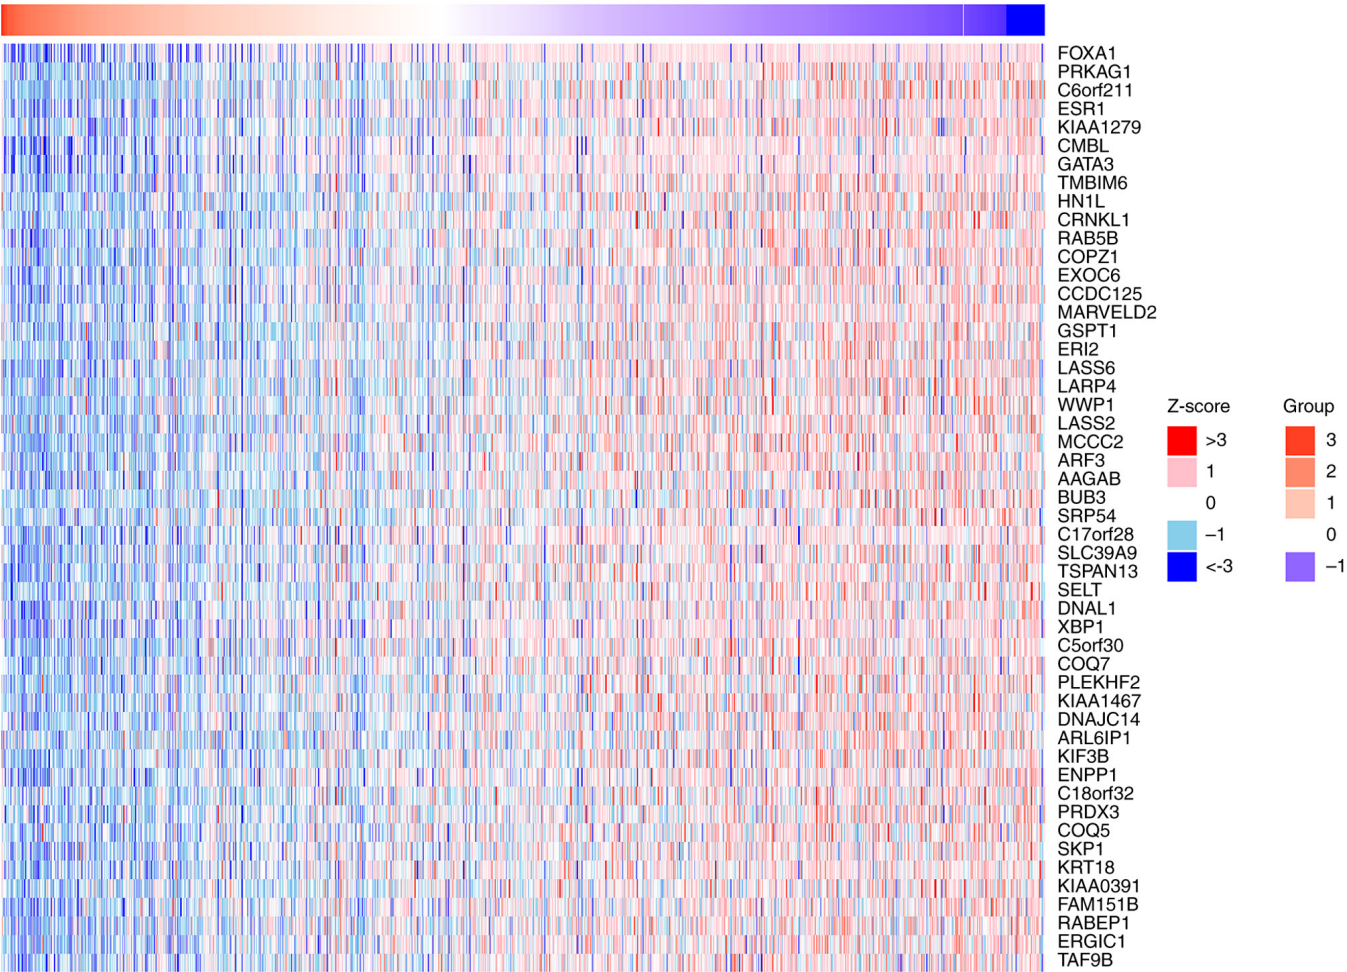

Figure S4. Heat map of negatively related genes of neuroregulatory protein 2.

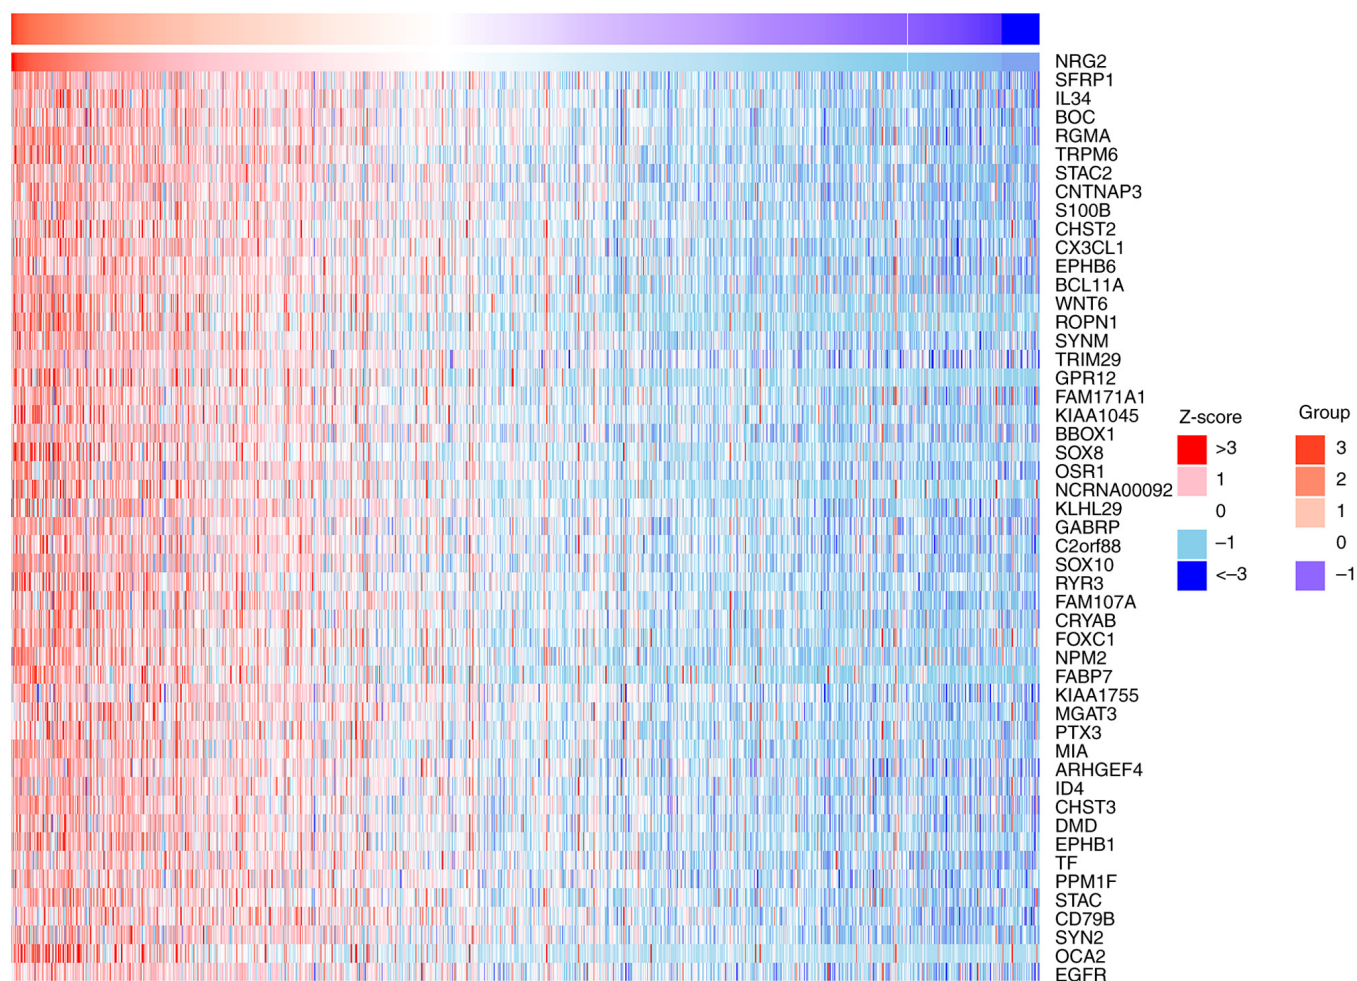

Supplement: Supplementary file 1 [file downloadSupplementary]
